# Supplementary material for: Differential Impacts of Soybean and Fish Oils on Hepatocyte Lipid Droplet Accumulation and Endoplasmic Reticulum Stress in Primary Rabbit Hepatocytes
Source: Hindawi journal article supplement (doi:10.1155/2016/9717014), 2016-01-01

Supplementary Figure 1.

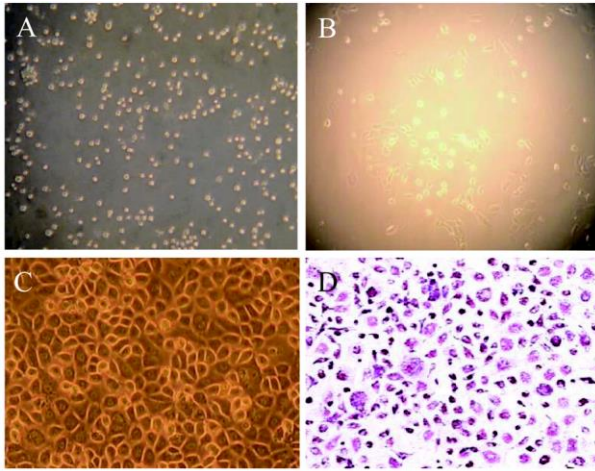

Supplementary Figure 2.

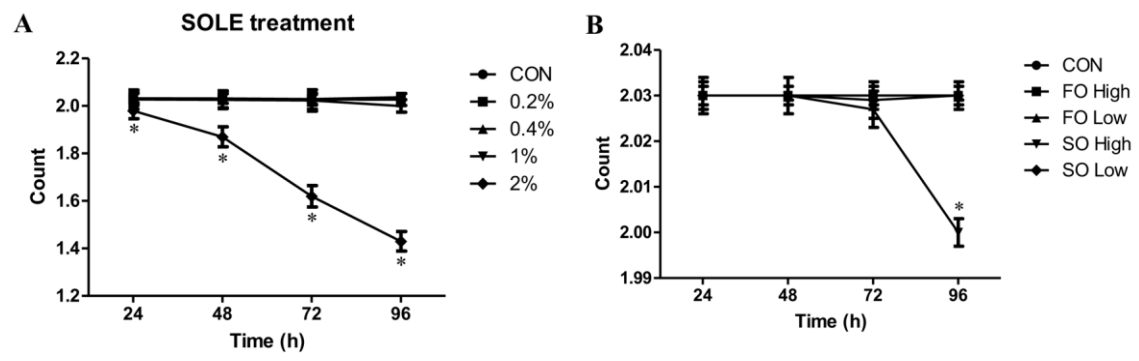

Supplement: f1 [file 9717014.f1.pdf]
